# Supplementary material for: Facile Attachment of Halides and Pseudohalides to Dodecaborate(2-) via Pd-catalyzed Cross-Coupling
Source: MDPI journal article supplement (doi:10.3390/molecules28073245), 2023-04-05
Supplement: s1 [file s1]

# Facile Attachment of Halides and Pseudohalides to Dodecaborate(2-) via Pd-catalyzed Cross-Coupling

Mahmoud K. Al-Joumhawy, Jui-Chi Chang, Fariba Sabzi and Detlef Gabel \*

## Supporting Materials

### Contents

|                            |    |
|----------------------------|----|
| General Information: ..... | 1  |
| General Procedure: .....   | 2  |
| NMR Spectra: .....         | 3  |
| MS spectra .....           | 11 |

### General Information:

Reagents and solvents were commercially available and used without further purification.  $B_{12}H_{11}I$  was prepared according to the literature procedure with some modification.<sup>1</sup> Tetrabutylammonium bromide, tetrabutylammonium chloride, tetrabutylammonium fluoride trihydrate, copper cyanide, sodium bromide, sodium chloride, tetrabutylammonium azide, sodium azide, Davephos, and  $Pd_2(dba)_3$  were purchased from Sigma-Aldrich and were used as received. DMSO, dichloromethane, acetonitrile and silica gel (Grade 60, 230-400 Mesh) were from Carl Roth. Celite (545 filter aid, not acid washed, powder) was from Fisher. All cross-coupling reactions were performed in an oven dried 10ml round bottom flask. Thinlayer chromatography (TLC) AluSil plates were from Macherey-Nagel. TLC samples for borane-containing compounds were stained with 1 wt. %  $PdCl_2$  in 6 M HCl and were developed using a heat gun.  $^{11}B$  NMR spectra were recorded on a JEOL 400 MHz spectrometer at 25 °C. Chemical shifts were referenced relative to external  $BF_3$  etherate. MestReNova V10.0.2-15465 S3 software was used to visualize the spectra. Coupling constants (J) are reported in Hertz (Hz). Mass spectra in the negative-ion mode were recorded with a WATERS QTOF Premier spectrometer. An open-vessel microwave oven (CEM Discover, Model 908860, or HNZXIB, Model MCR-3) was used.

1. Al-Joumhawy, M.; Cendoya, P.; Shmalko, A.; Marei, T.; Gabel, D., Improved synthesis of halo- and oxonium derivatives of dodecahydrido-closo-dodecaborate(2-). J. Organomet. Chem. 2021, 949, 121967.

### General Procedure:

A dry 10 mL round bottom flask fitted with condenser was charged with 1.0 equiv of  $(\text{Bu}_4\text{N})_2\text{B}_{12}\text{H}_{11}\text{I}$ ,  $\text{Pd}_2(\text{dba})_3$  (5 mol%), Davephos (10 mol%), and (2-4 equiv) of  $\text{Bu}_4\text{NBr}$  or  $\text{NaBr}$  for synthesis of  $(\text{Bu}_4\text{N})_2\text{B}_{12}\text{H}_{11}\text{Br}$ ,  $\text{Bu}_4\text{NCl}$  or  $\text{NaCl}$  for synthesis of  $(\text{Bu}_4\text{N})_2\text{B}_{12}\text{H}_{11}\text{Cl}$ ,  $\text{Bu}_4\text{NN}_3$  or  $\text{NaN}_3$  for synthesis of  $(\text{Bu}_4\text{N})_2\text{B}_{12}\text{H}_{11}\text{N}_3$ ,  $\text{Bu}_4\text{NF} \cdot 3\text{H}_2\text{O}$  (4.0 equiv) and  $\text{KOH}$  (4.0 equiv) for synthesis of  $(\text{Bu}_4\text{N})_2\text{B}_{12}\text{H}_{11}\text{OH}$ , copper(I) cyanide for synthesis of  $(\text{Bu}_4\text{N})_2\text{B}_{12}\text{H}_{11}\text{CN}$ . Subsequently 2.0 mL of anhydrous DMSO was added. The reaction flask was filled with  $\text{N}_2$  and connected to a condenser. The round bottom flask was placed in a CEM microwave oven at 150 °C, maximum power 300 W, for 15 mins with stirring (high) or heated in an oil bath at 150 °C for 3-5 hours until the starting  $(\text{Bu}_4\text{N})_2\text{B}_{12}\text{H}_{11}\text{I}$  was completely consumed as judged by  $^{11}\text{B}$  NMR and TLC. The mixture was cooled to room temperature and then filtered through a funnel filled with cotton, celite and filter paper. The resulting solution was concentrated under reduced pressure. The crude product was subjected to silica gel chromatography using a gradient of acetonitrile (0-25%) in DCM.

## NMR Spectra:

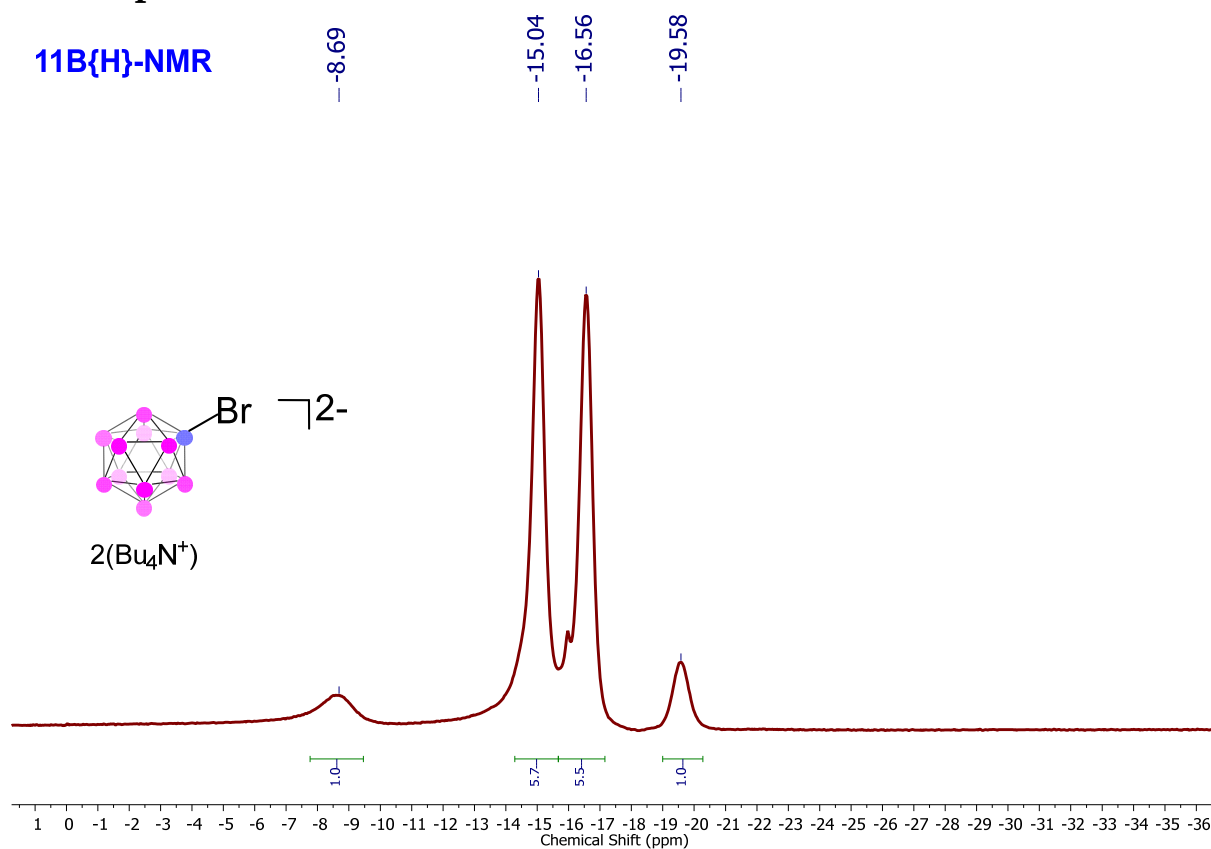

**Figure S1.**  $^{11}\text{B}\{\text{H}\}$ -NMR of  $(\text{Bu}_4\text{N})_2\text{B}_{12}\text{H}_{11}\text{Br}$ .

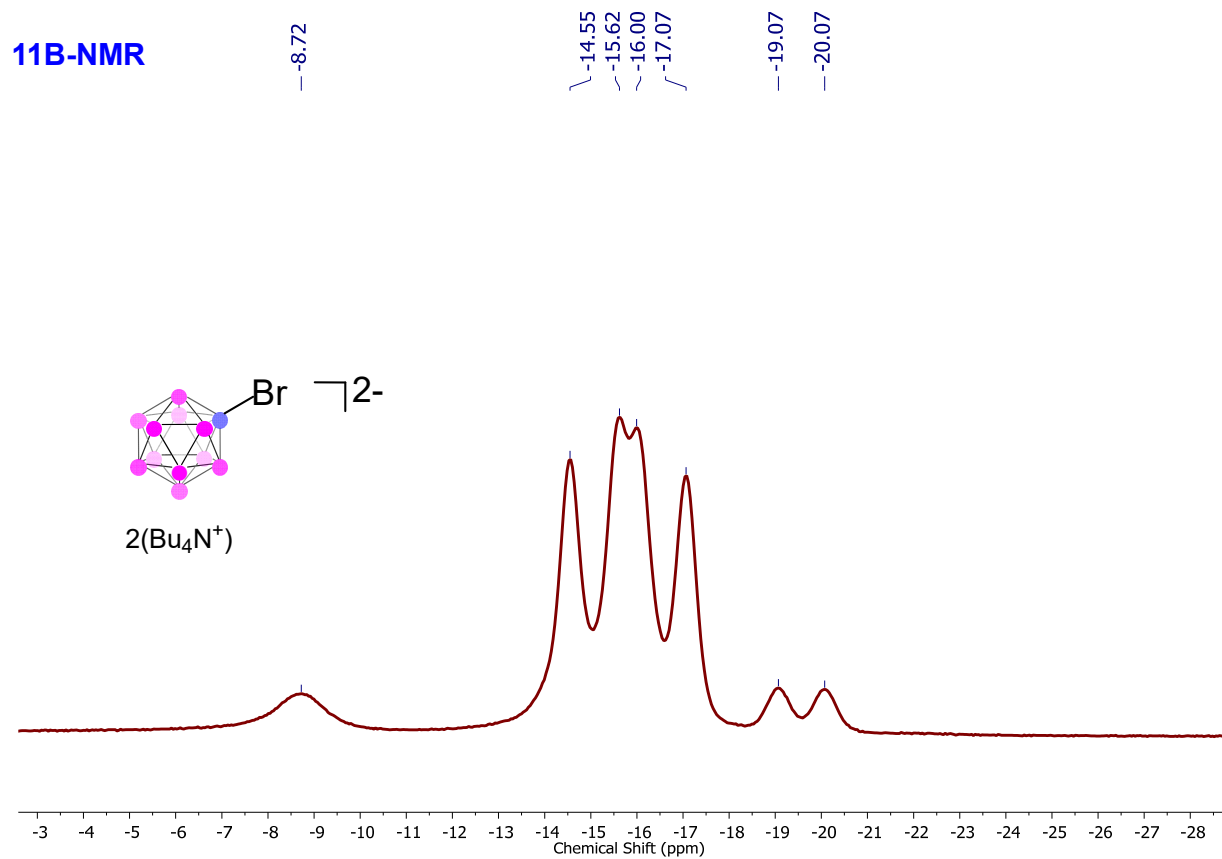

**Figure S2.**  $^{11}\text{B}$ -NMR of  $(\text{Bu}_4\text{N})_2\text{B}_{12}\text{H}_{11}\text{Br}$ .

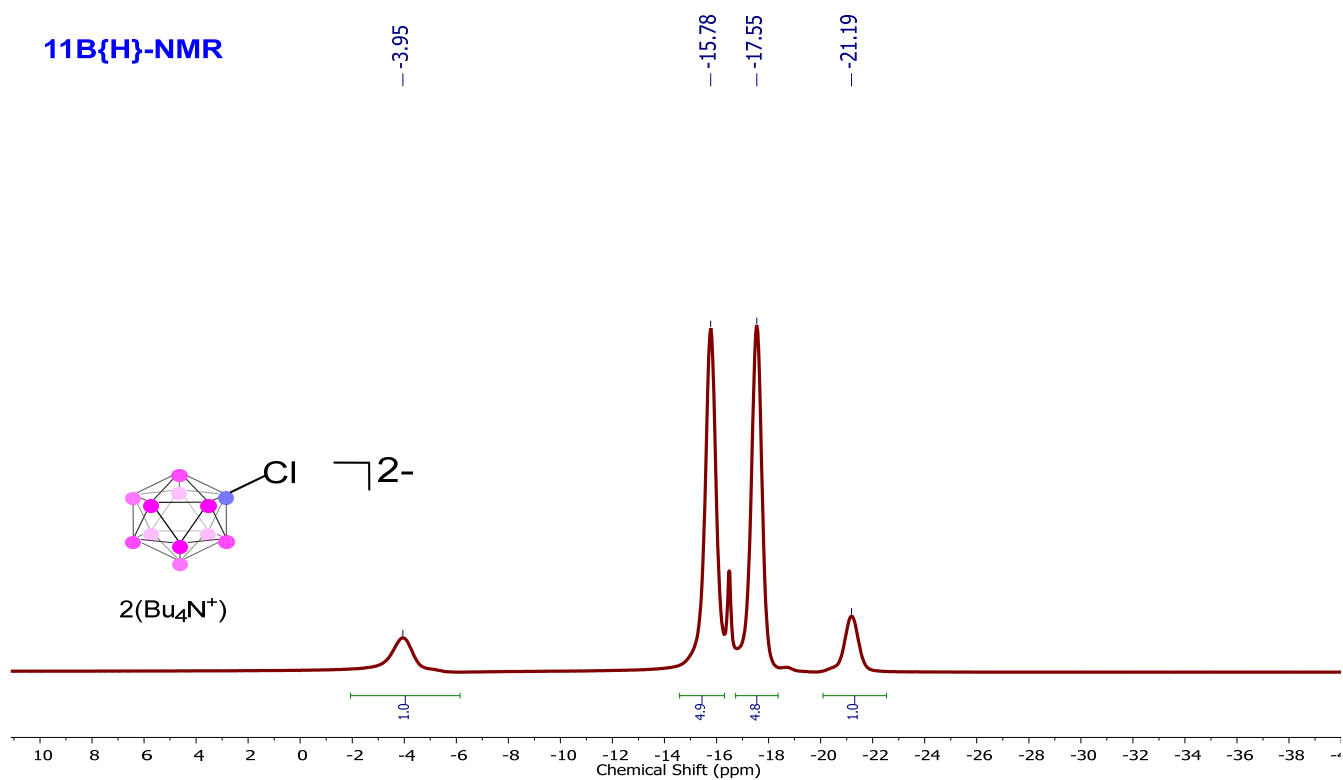

**Figure S3.**  $^{11}\text{B}\{\text{H}\}$ -NMR of  $(\text{Bu}_4\text{N})_2\text{B}_{12}\text{H}_{11}\text{Cl}$ .

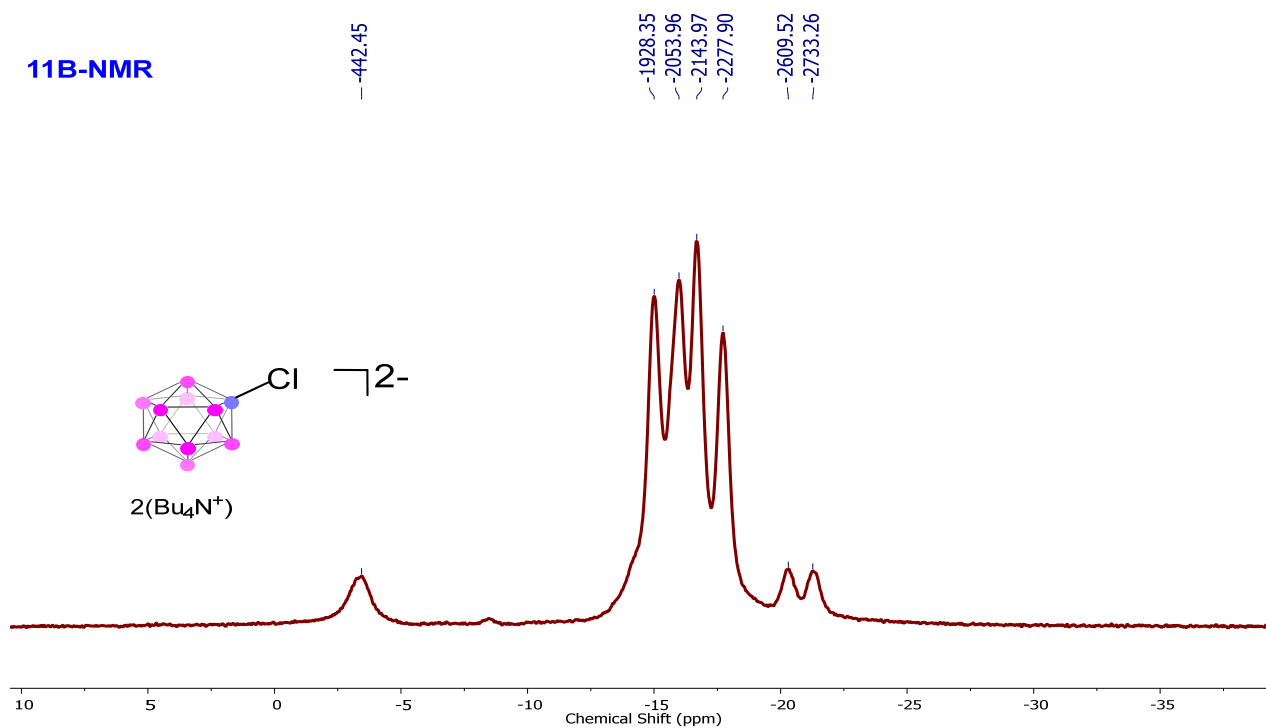

**Figure S4.**  $^{11}\text{B}$ -NMR of  $(\text{Bu}_4\text{N})_2\text{B}_{12}\text{H}_{11}\text{Cl}$ .

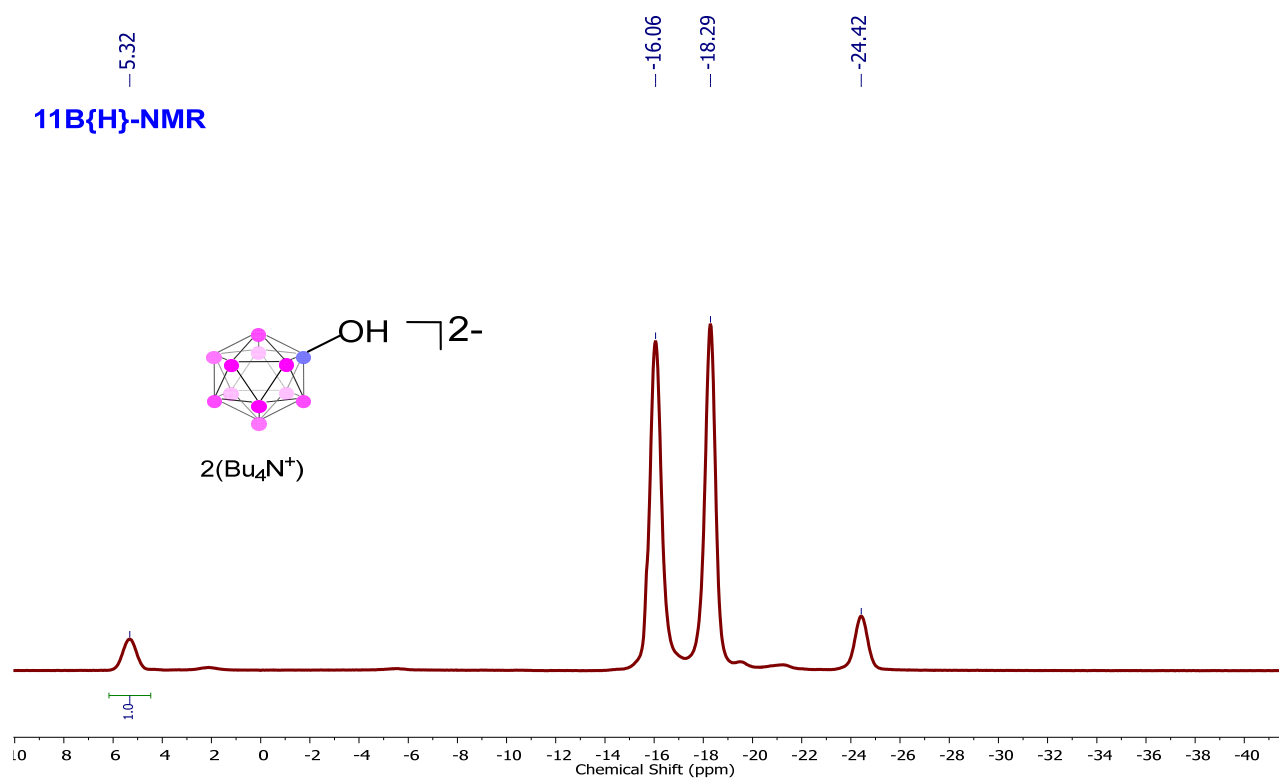

**Figure S5.**  $^{11}\text{B}\{\text{H}\}$ -NMR of  $(\text{Bu}_4\text{N})_2\text{B}_{12}\text{H}_{11}\text{OH}$ .

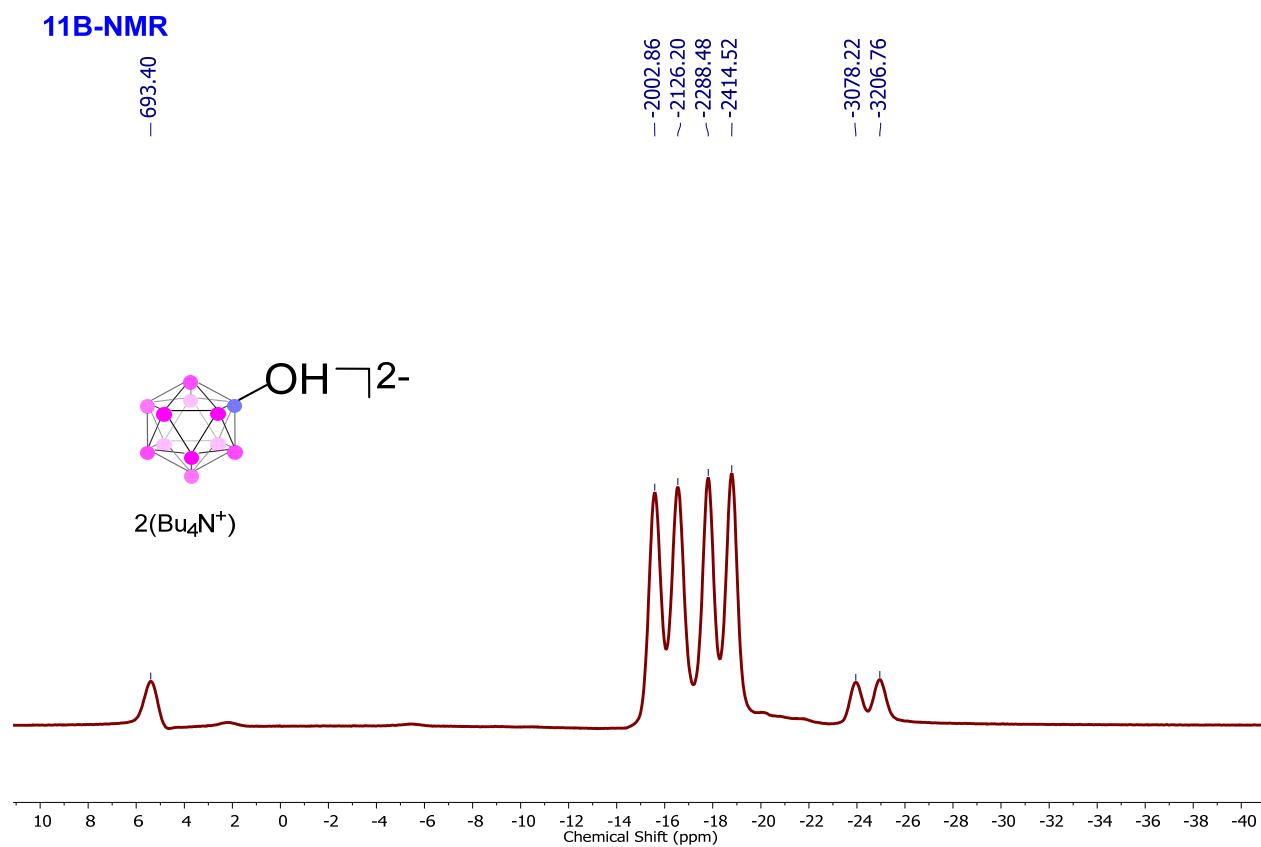

**Figure S6.**  $^{11}\text{B}$ -NMR of  $(\text{Bu}_4\text{N})_2\text{B}_{12}\text{H}_{11}\text{OH}$ .

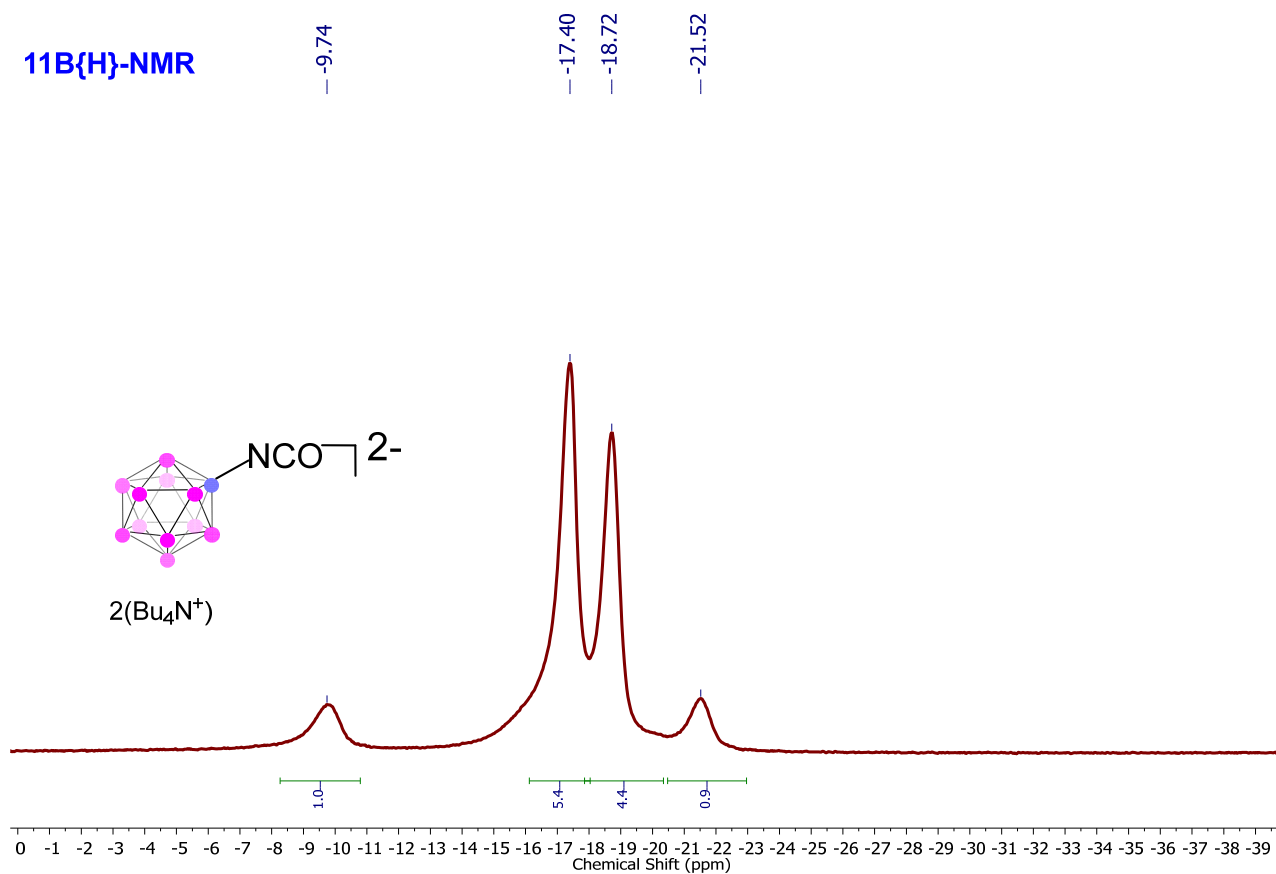

**Figure S7.**  $^{11}\text{B}\{\text{H}\}$ -NMR of  $(\text{Bu}_4\text{N})_2\text{B}_{12}\text{H}_{11}\text{NCO}$ .

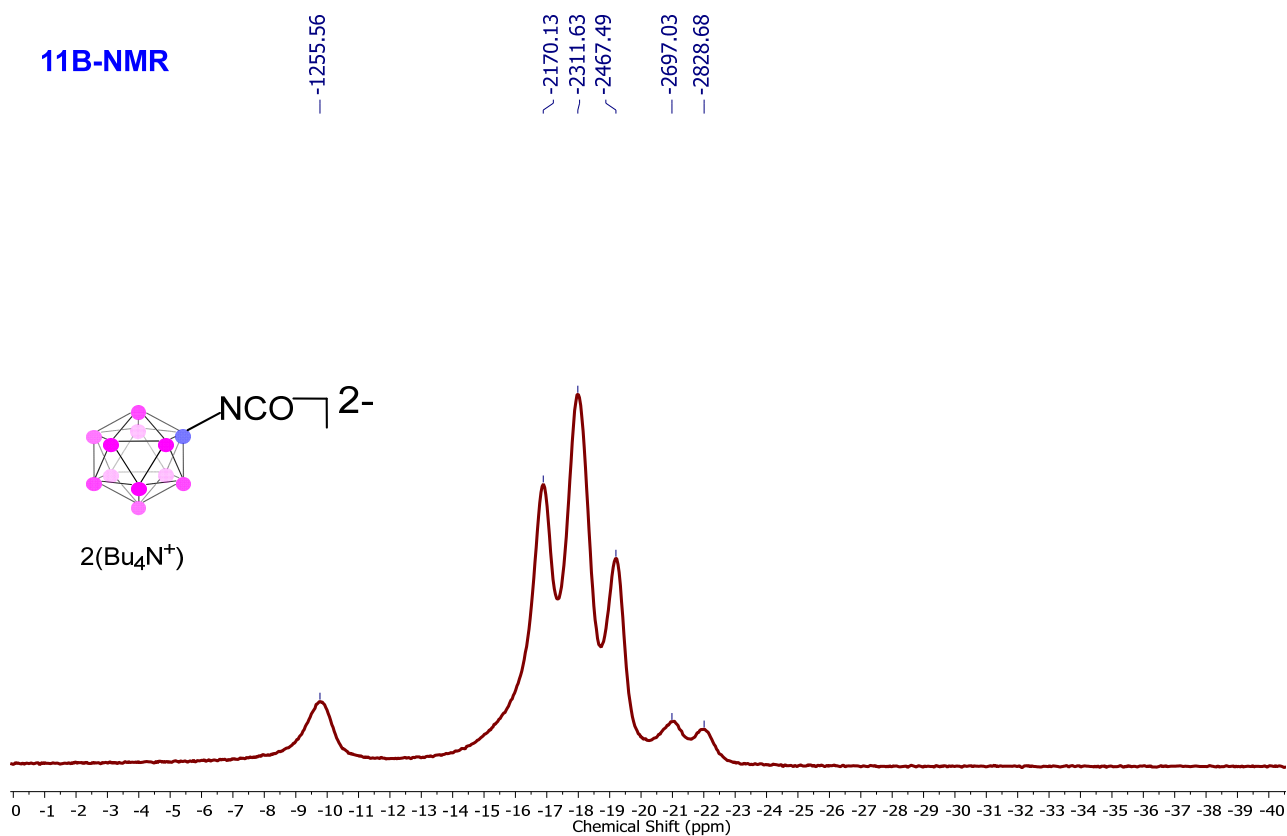

**Figure S8.**  $^{11}\text{B}$ -NMR of  $(\text{Bu}_4\text{N})_2\text{B}_{12}\text{H}_{11}\text{NCO}$ .

**$^{11}\text{B}\{\text{H}\}$ -NMR**

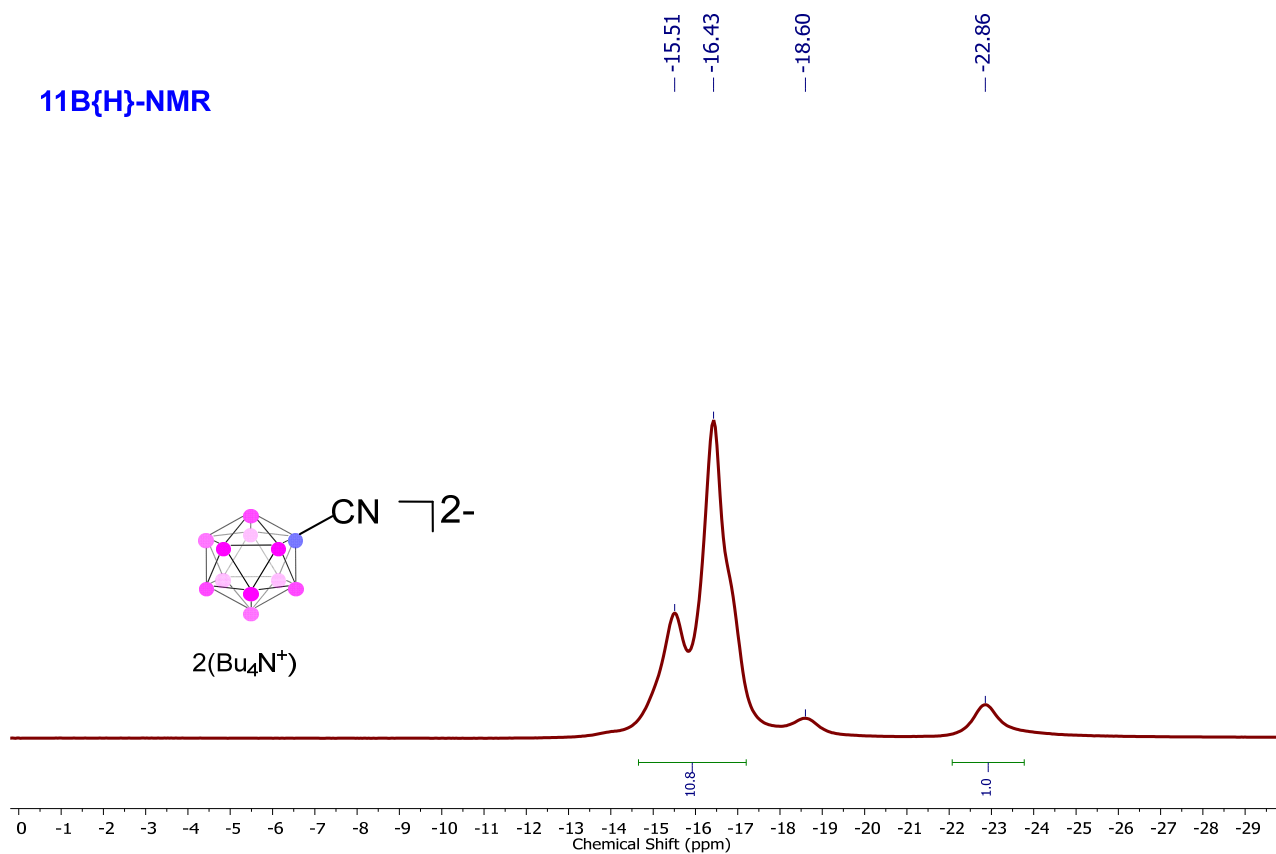

**Figure S9.**  $^{11}\text{B}\{\text{H}\}$ -NMR of  $(\text{Bu}_4\text{N})_2\text{B}_{12}\text{H}_{11}\text{CN}$ .

**$^{11}\text{B}$ -NMR**

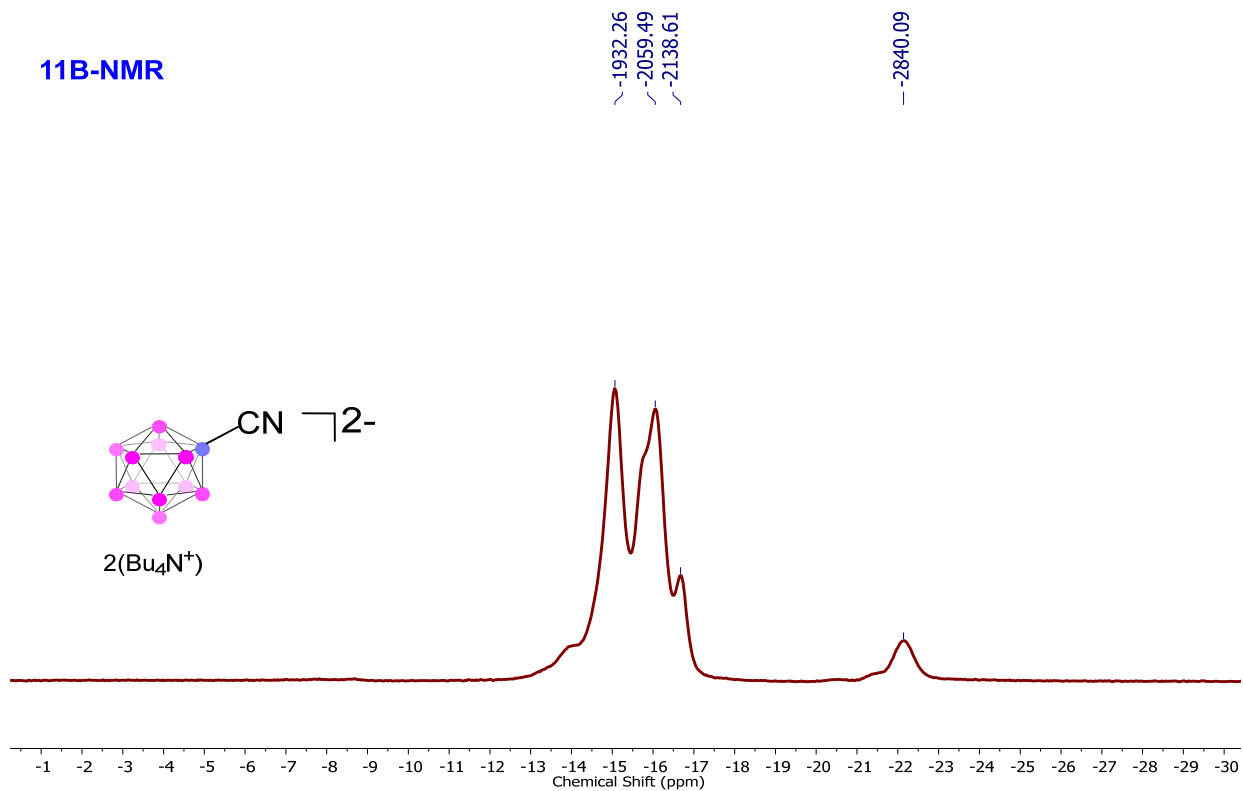

**Figure S10.**  $^{11}\text{B}\{\text{H}\}$ -NMR of  $(\text{Bu}_4\text{N})_2\text{B}_{12}\text{H}_{11}\text{CN}$ .

**$^{11}\text{B}\{\text{H}\}$ -NMR**

— -2.73

— -16.37

— -17.27

— -20.67

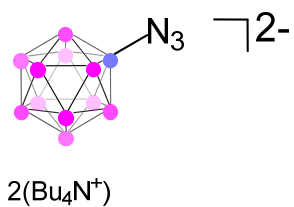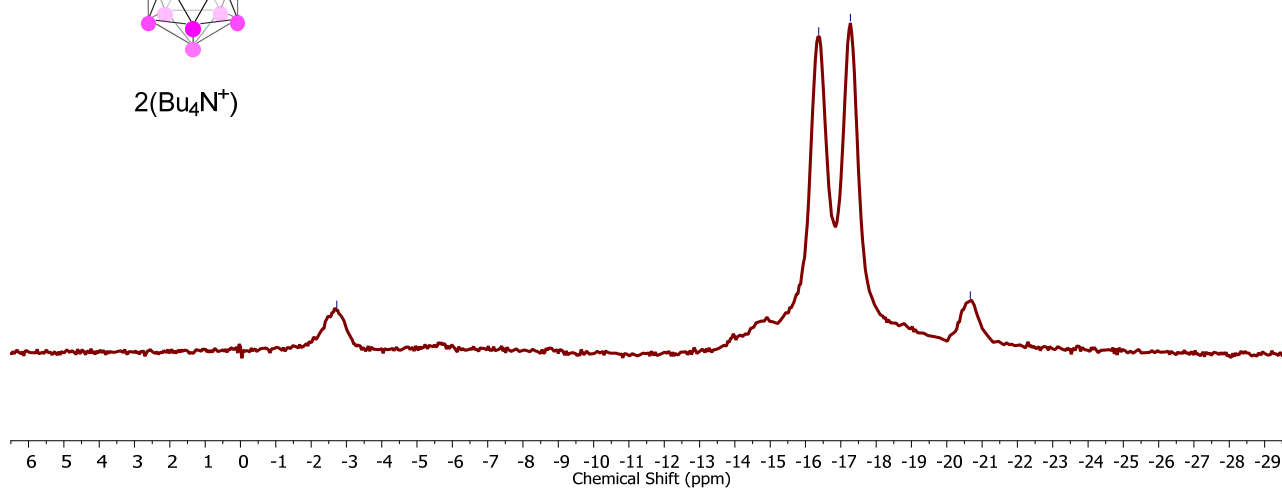

**Figure S11.**  $^{11}\text{B}\{\text{H}\}$ -NMR of  $(\text{Bu}_4\text{N})_2\text{B}_{12}\text{H}_{11}\text{N}_3$ .

**$^{11}\text{B}$ -NMR**

— -489.23

— -2032.77

— -2142.64

— -2224.61

— -2323.11

— -2597.11

— -2726.35

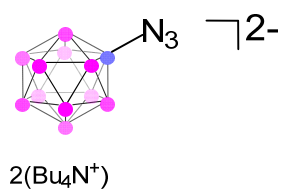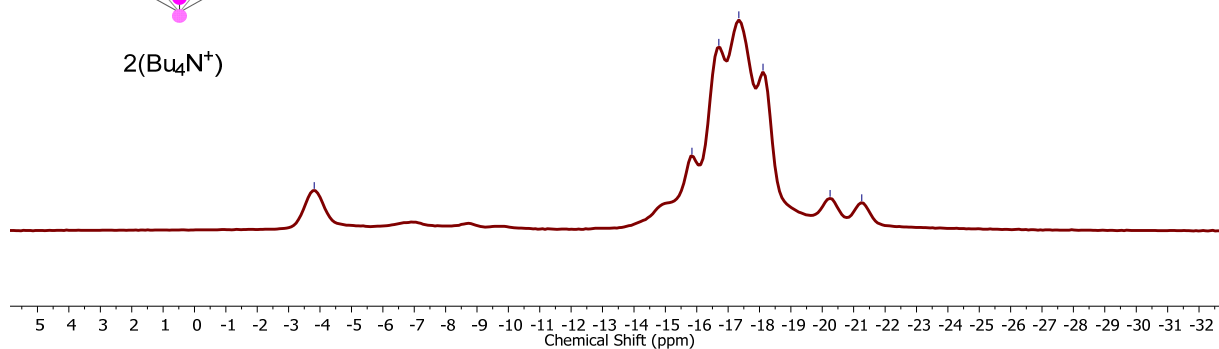

**Figure S12.**  $^{11}\text{B}\{\text{H}\}$ -NMR of  $(\text{Bu}_4\text{N})_2\text{B}_{12}\text{H}_{11}\text{N}_3$ .



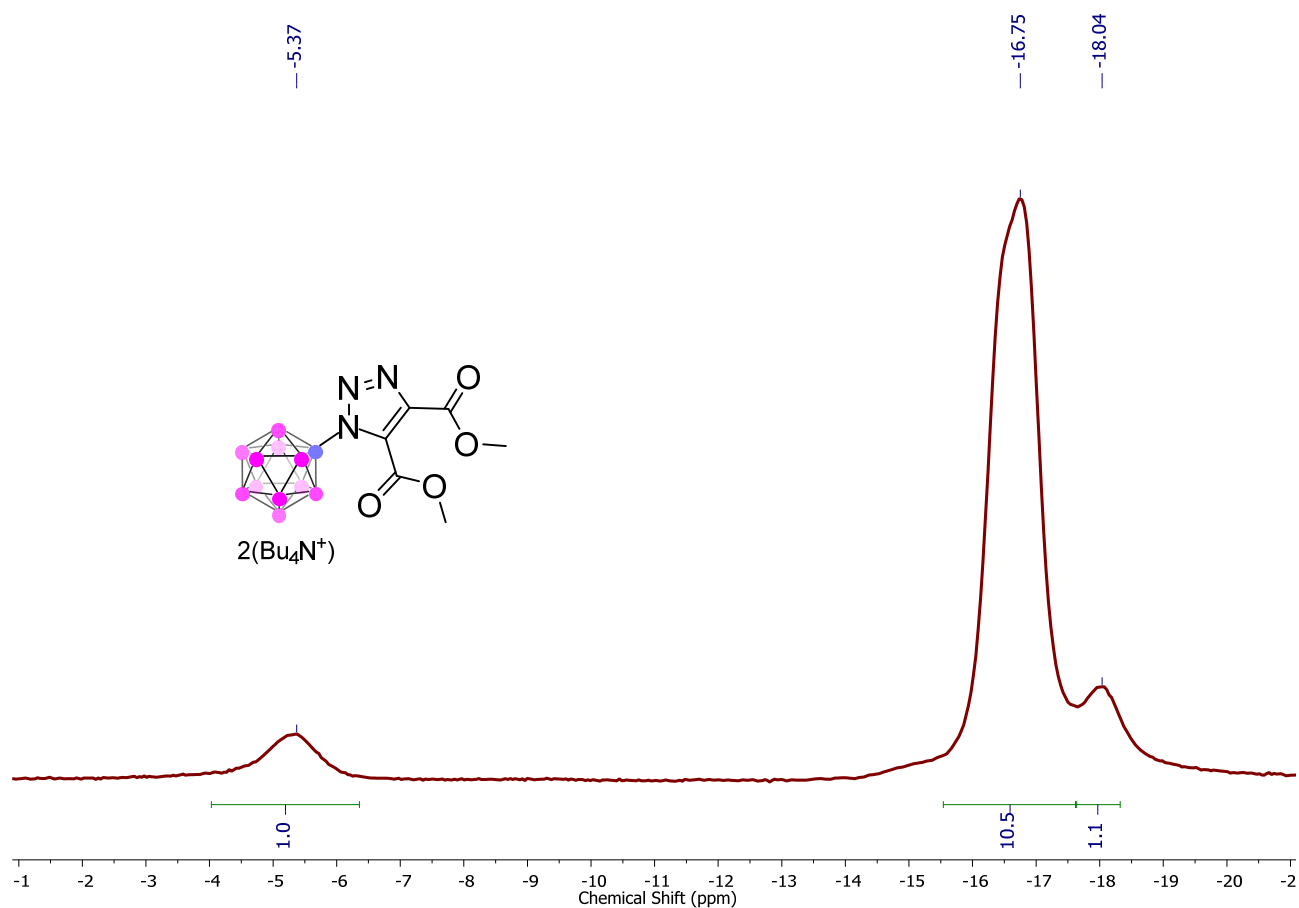

**Figure S13.**  $^{11}\text{B}\{\text{H}\}$ -NMR of  $(\text{Bu}_4\text{N})_2\text{B}_{12}\text{H}_{11}\text{-C}_6\text{H}_6\text{O}_4$ .

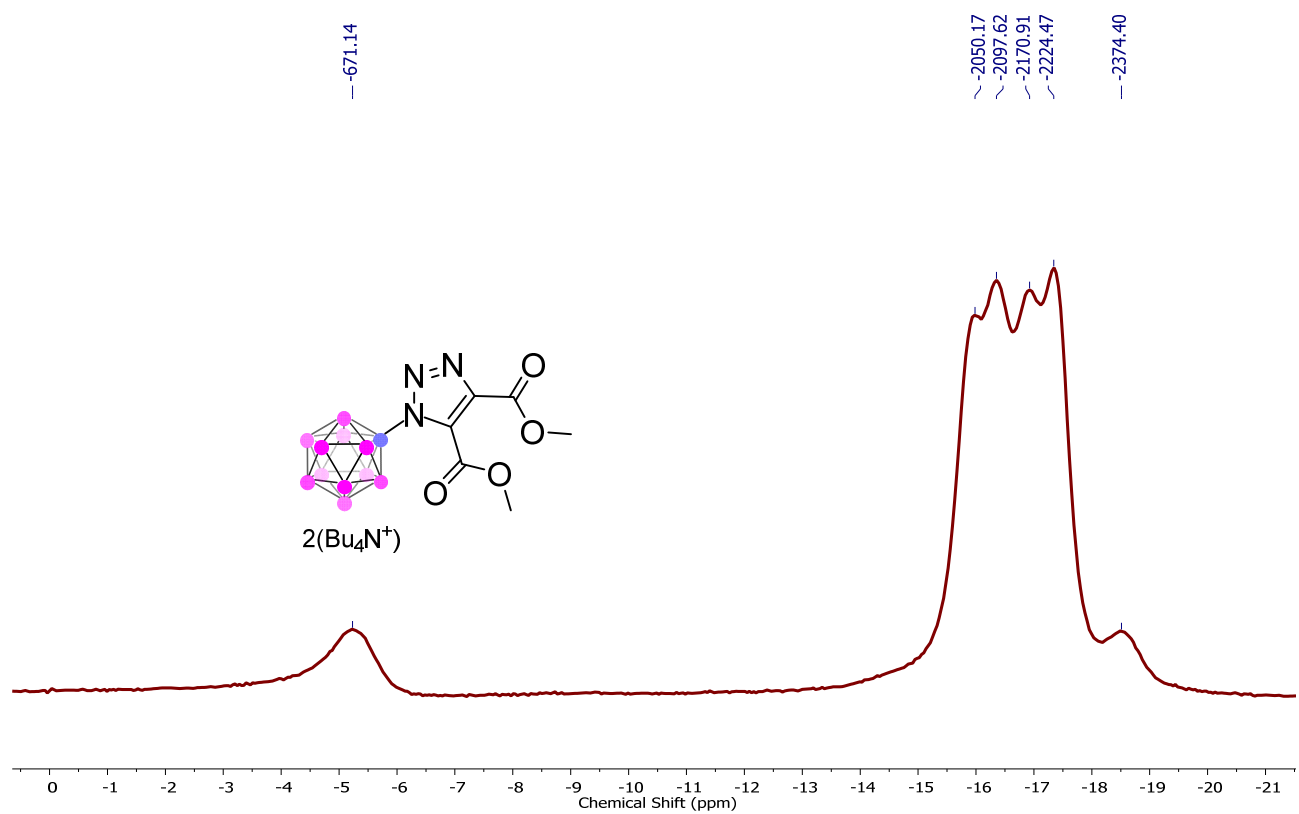

**Figure S14.**  $^{11}\text{B}$ -NMR of  $(\text{Bu}_4\text{N})_2\text{B}_{12}\text{H}_{11}\text{-C}_6\text{H}_6\text{O}_4$ .

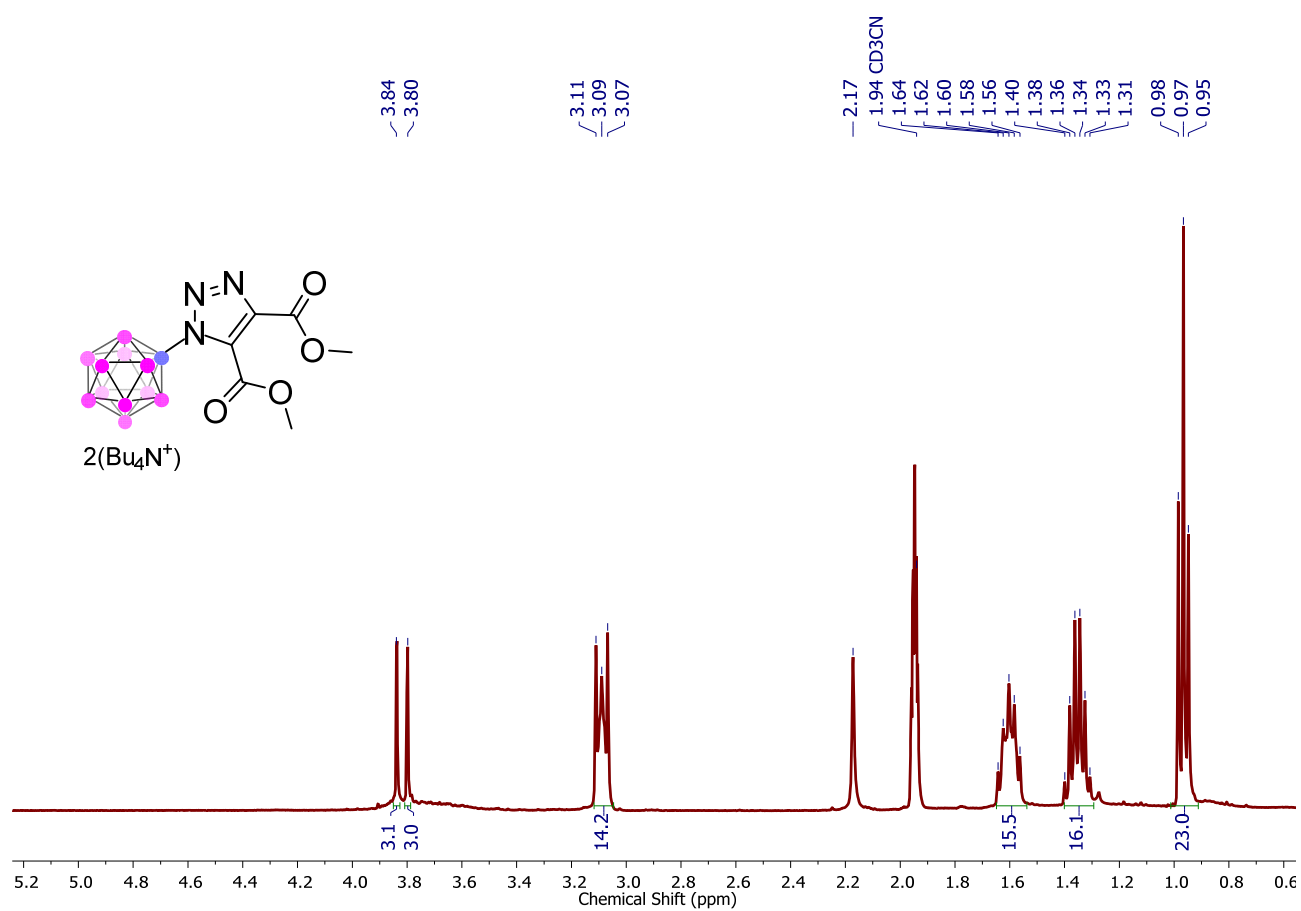

**Figure S15.** <sup>1</sup>H-NMR of the click reaction product.

## MS spectra:

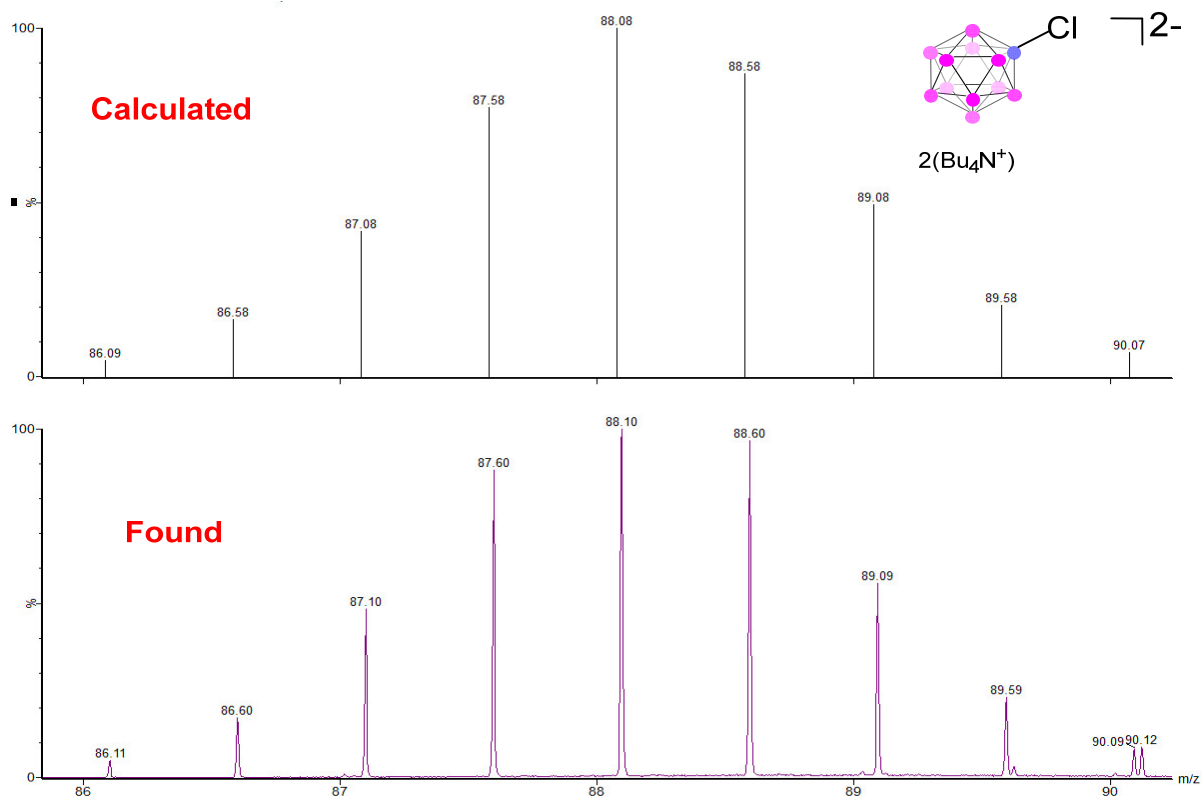

Figure S16. MS spectrum of  $[\text{B}_{12}\text{H}_{11}\text{Cl}]^{2-}$ .

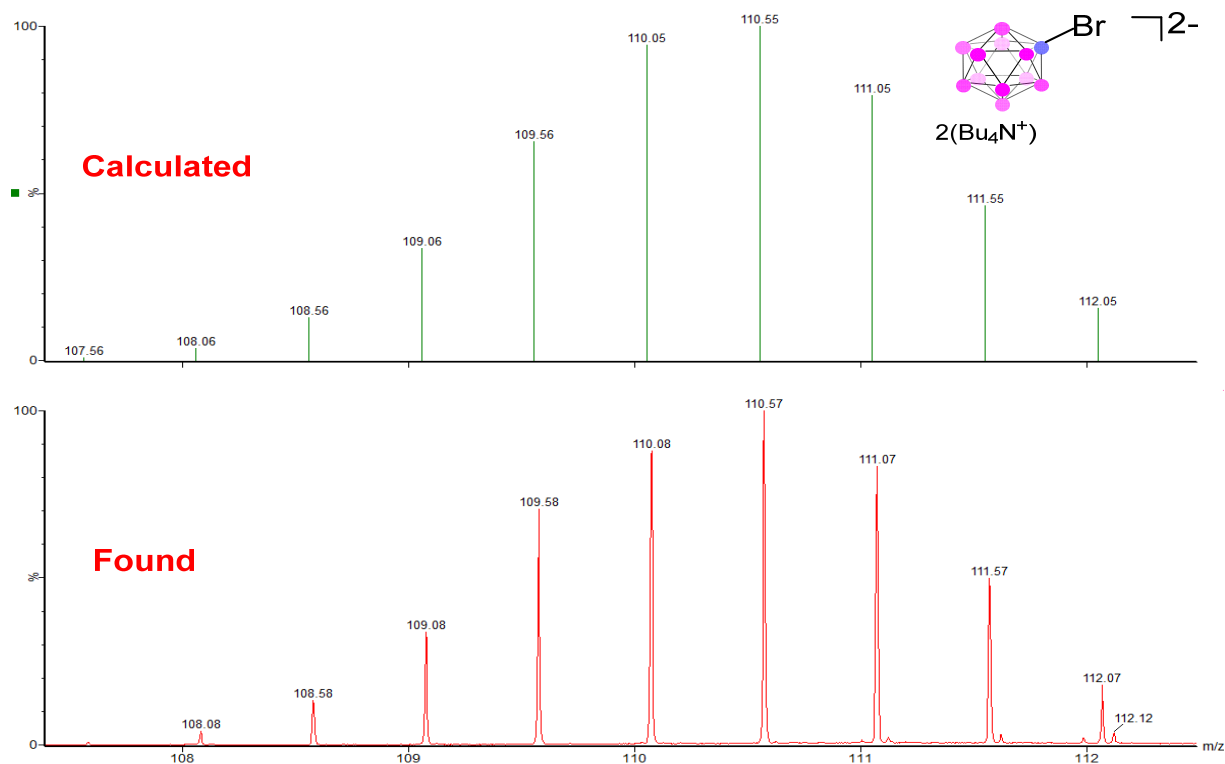

Figure S17. MS spectrum of  $[\text{B}_{12}\text{H}_{11}\text{Br}]^{2-}$ .

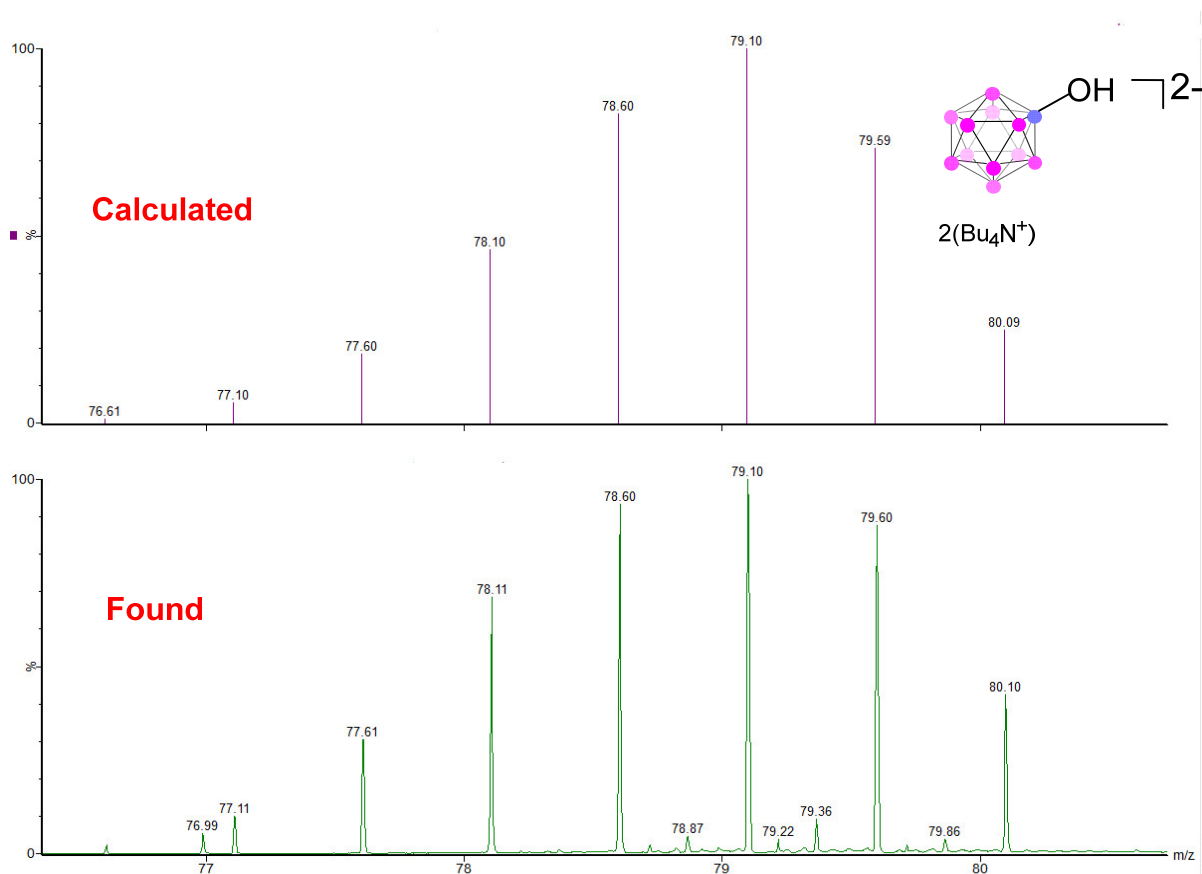

Figure S18. MS spectrum of  $[B_{12}H_{11}OH]^{2-}$ .

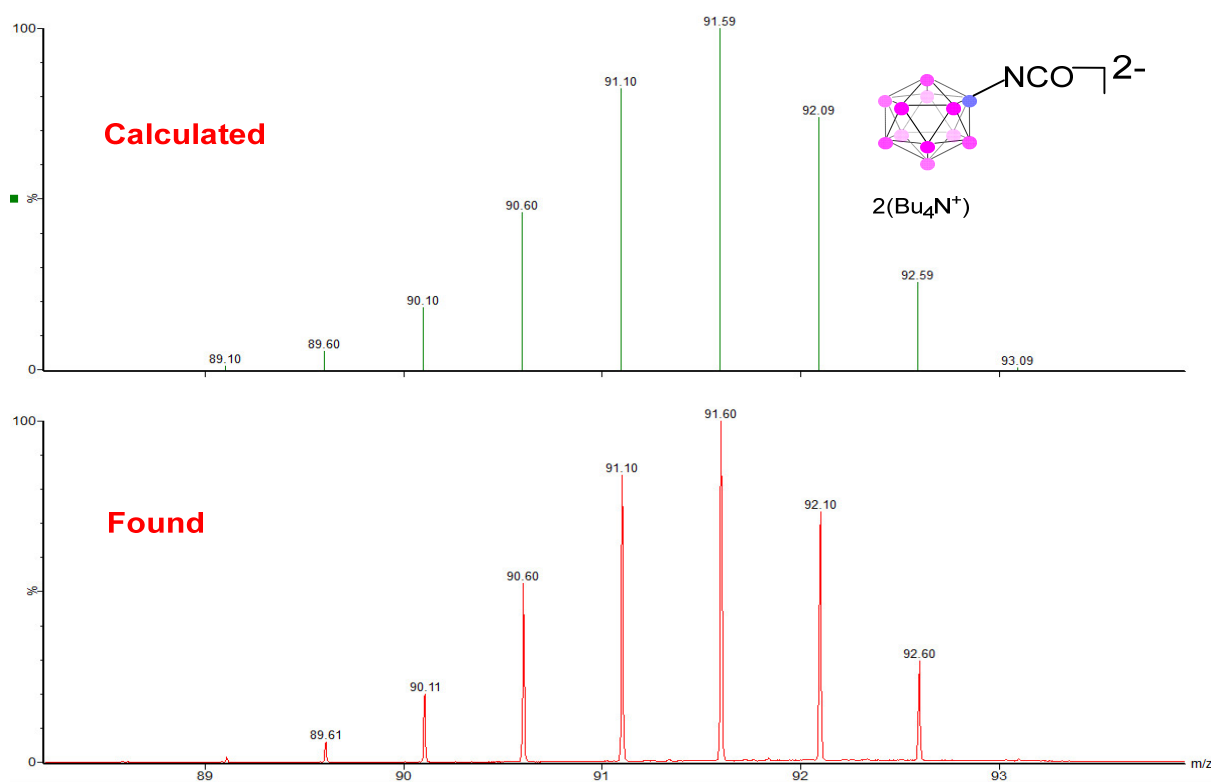

Figure S19. MS spectrum of  $[B_{12}H_{11}NCO]^{2-}$ .

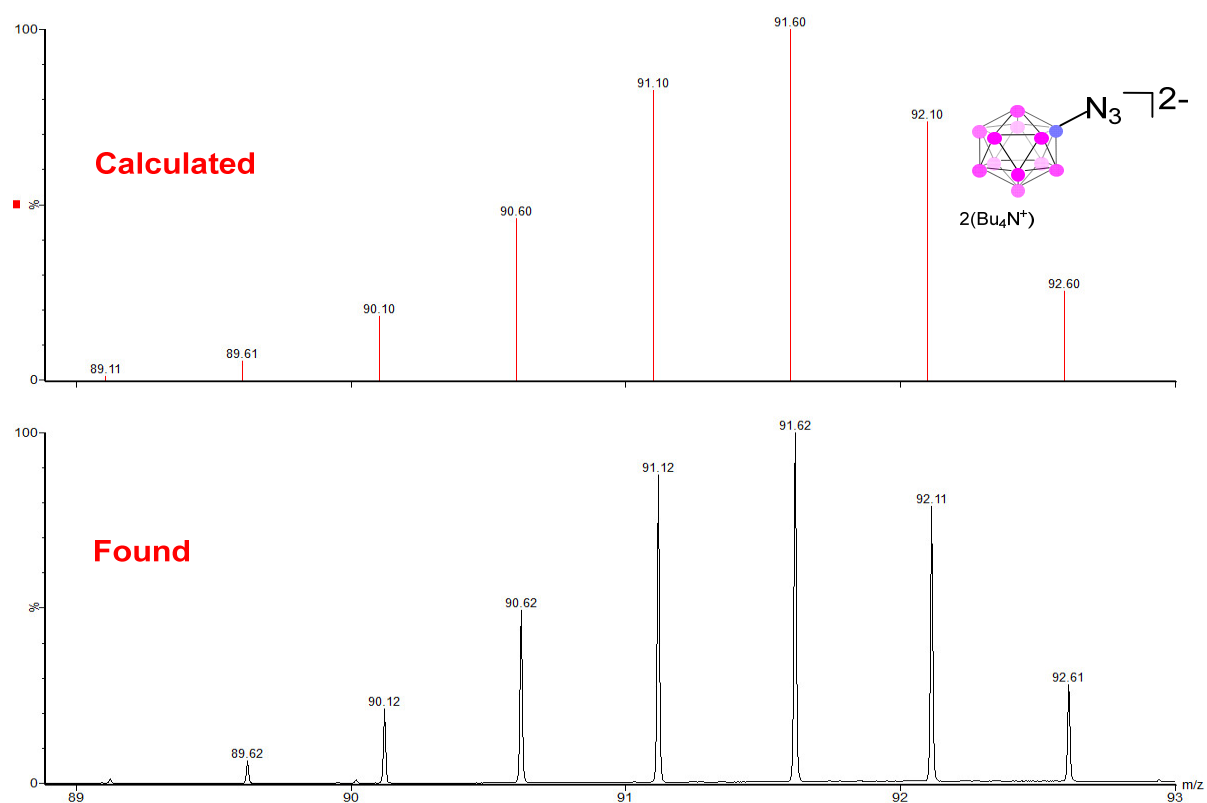

Figure S20. MS spectrum of  $[B_{12}H_{11}N_3]^{2-}$ .

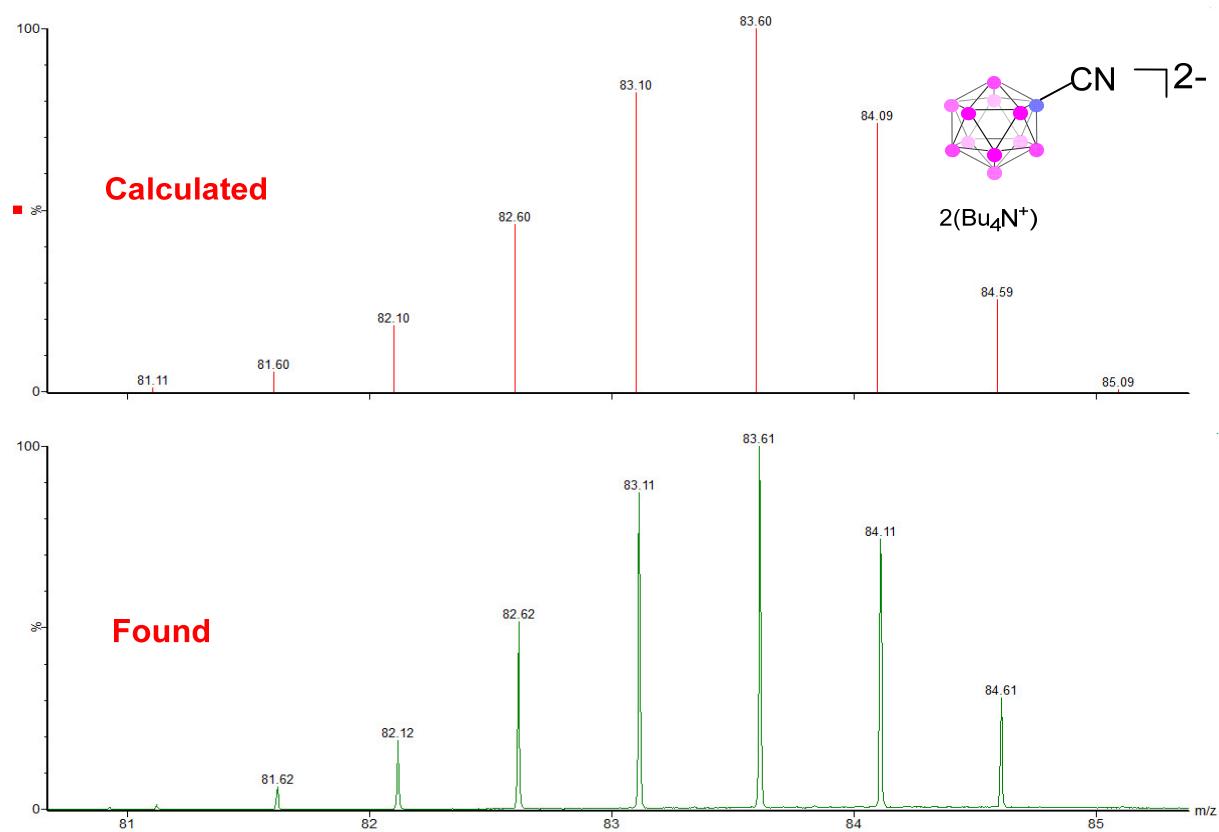

Figure S21. MS spectrum of  $[B_{12}H_{11}CN]^{2-}$ .

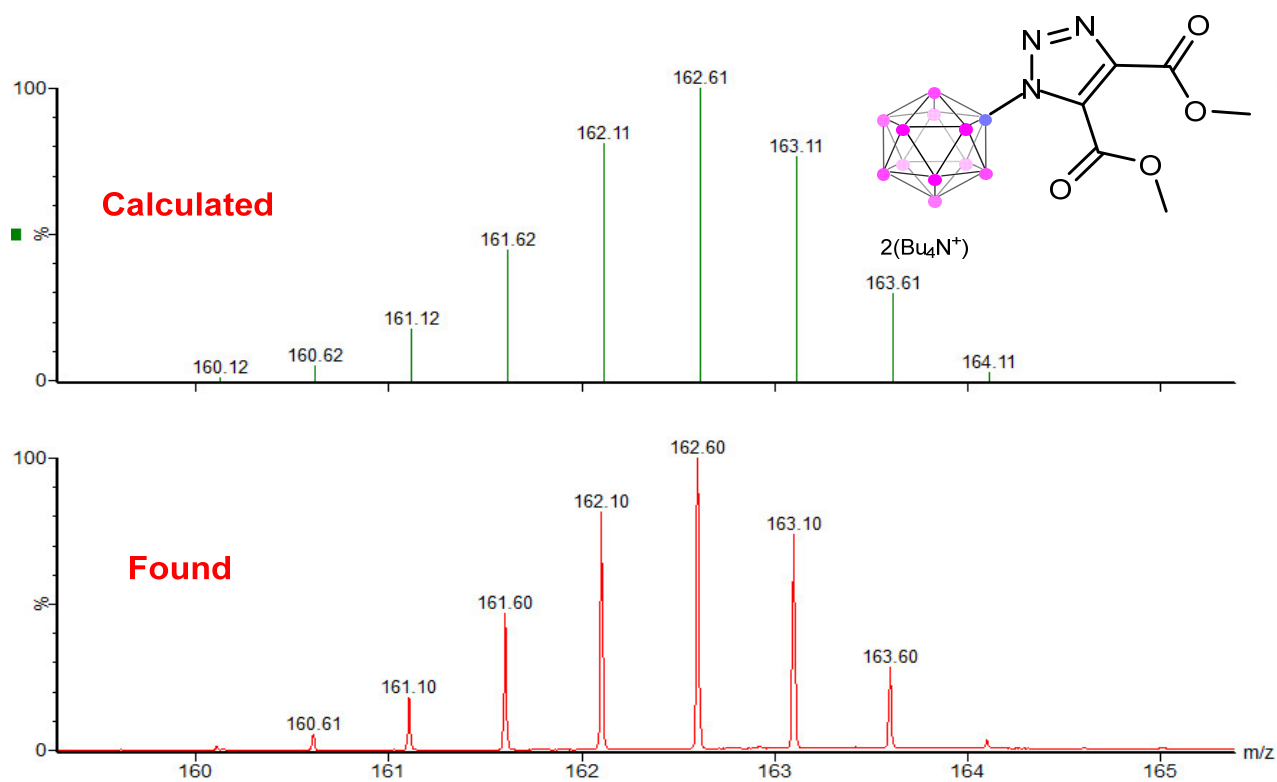

**Figure S22.** MS spectrum of  $[\text{B}_{12}\text{H}_{11}\text{-C}_6\text{H}_6\text{O}_4]^{2-}$ .
